# Supplementary material for: Visible light induced hydrogen generation using a hollow photocatalyst with two cocatalysts separated on two surface sides
Source: Royal Society of Chemistry journal article supplement (doi:10.1039/c3cp54629b), 2014-01-01
Supplement: c3cp54629b.pdf [file c3cp54629b.pdf]

# Visible Light Induced Hydrogen Generation using a Hollow Photocatalyst with Two Cocatalysts Separated on Two Surface Sides

*Minh-Hao Pham,<sup>a</sup> Cao-Thang Dinh,<sup>a</sup> Gia-Thanh Vuong,<sup>a</sup> Ngoc-Don Ta,<sup>b</sup> and Trong-On Do<sup>a,\*</sup>*

<sup>a</sup> Department of Chemical Engineering, Centre en catalyse et chimie verte (C<sub>3</sub>V), Laval University, Quebec, G1V 0A6, Canada

<sup>b</sup> School of Chemical Engineering, Hanoi University of Science and Technology, Hanoi, Vietnam

Corresponding Author: trong-on.do@gch.ulaval.ca

## SUPPORTING INFORMATION

## Chemicals

FeCl<sub>3</sub>·6H<sub>2</sub>O (Aldrich, 97 %), Fe(NO<sub>3</sub>)<sub>3</sub>·9H<sub>2</sub>O (Aldrich, ≥ 98 %), 2-amino-1,4-benzenedicarboxylic acid (Aldrich, 99 %), Pluronic F127 (EO<sub>97</sub>PO<sub>69</sub>EO<sub>97</sub>, average M<sub>n</sub> = 12,600, Aldrich), CH<sub>3</sub>COOH (Fisher, 99.7 %), titanium(IV) (triethanolaminate)isopropoxide (80 wt% in 2-propanol, Aldrich), titanium(IV) butoxide (Aldrich, 97 %), 2-propanol (Aldrich, 99.5 %), titanium(IV) tetraisopropoxide (Aldrich, 97 %), ethanol (95 %), H<sub>2</sub>PtCl<sub>6</sub>·6H<sub>2</sub>O (Aldrich, ≥ 37.5 % Pt basis) and lactic acid (Aldrich, 85–90 % in water). All chemicals were used as received without further purification.

## Synthesis of MIL-88B nanocrystals

MIL-88B nanocrystals were prepared by following our previously reported approach.<sup>13</sup> Briefly, the aqueous dispersion (15 mL) of 2-aminoterephthalic acid (60 mg, 0.33 mmol), FeCl<sub>3</sub>·6H<sub>2</sub>O (180 mg, 0.66 mmol), Pluronic F127 (160 mg) and acetic acid (0.6 mL, 10.5 mmol) was heated at 110 °C for 24 h. The resulting solid was isolated and washed several times with ethanol by centrifugation to remove the surfactant and excess reactants.

## Titanium precursor grafting on MIL-88B nanocrystals

The as-made MIL-88B (100 mg) was dried overnight at 150 °C under vacuum to remove terminal water molecules. To this dehydrated form, 2 M TEAI solution in 2-propanol (4 mL) was poured and stirred at room temperature for 2 h. The TEAI-grafted MIL-88B was then collected, washed with 2-propanol by centrifugation and dried overnight at 100 °C.

## TiO<sub>2</sub> coating on MIL-88B nanocrystals

TEAI-grafted MIL-88B (100 mg) was dispersed in 80 mL of 6 mM TEAI solution in ethanol (5 vol. % H<sub>2</sub>O) and then refluxed for 24 h under vigorous stirring. The MIL-88B@TiO<sub>2</sub> core-shell was collected and washed several times with ethanol by centrifugation.

## Preparation of α-Fe<sub>2</sub>O<sub>3</sub>-TiO<sub>2</sub>-PtO<sub>x</sub>

0.57 mL of H<sub>2</sub>PtCl<sub>6</sub> aqueous solution (10 mM) was added to the suspension of MIL-88B@TiO<sub>2</sub> (100 mg) in deionized water (12 mL) and stirred for 1 h at room temperature, followed by a rotary evaporation with a water bath at 50 °C to remove the water. The resulting product was calcined in air with heating rate at 5 °C min<sup>-1</sup> at 500 °C for 3 h to yield a dark red PtO<sub>x</sub>-loaded composite.

## Preparation of PtO<sub>x</sub>-[Fe-doped TiO<sub>2</sub>]

Fe-doped TiO<sub>2</sub> (Fe/Ti = 0.01) was prepared by sol-gel method.<sup>S1</sup> 50 mL of ethanol solution containing 5 mL of titanium(IV) tetraisopropoxide was added dropwise into 50 mL of distilled water containing

45 mg of  $\text{FeCl}_3 \cdot 6\text{H}_2\text{O}$  (pH adjusted to 1.5 with nitric acid) under vigorous stirring. After stirred for 24 h, the resulted solution was evaporated at 45 °C using a rotary evaporator and dried at 70 °C overnight. The obtained powder was calcined at 400 °C for 1 h to obtain Fe-doped  $\text{TiO}_2$ . The loading of  $\text{PtO}_x$  cocatalyst on the Fe-doped  $\text{TiO}_2$  was the same as the procedure for  $\alpha\text{-Fe}_2\text{O}_3\text{-TiO}_2\text{-PtO}_x$ .

### Preparation of $\text{PtO}_x\text{-[Fe}_2\text{TiO}_5]$

$\text{Fe}_2\text{TiO}_5$  (Fe/Ti = 1) was prepared by sol-gel method.<sup>S2</sup> 50 ml of 2-propanol solution containing 3.5 g of  $\text{Fe}(\text{NO}_3)_3 \cdot 9\text{H}_2\text{O}$  was added into 20 mL of 2-propanol solution containing 3.0 mL of titanium(IV) butoxide, followed by dropwise addition of 0.7 mL  $\text{H}_2\text{O}$  under stirring. After stirred for 4 h and further aged for 12 h, the mixture was evaporated at 70 °C and dried at 120 °C for 4 h. The obtained powder was calcined at 350 °C for 1 h and 700 °C for 5 h to obtain  $\text{Fe}_2\text{TiO}_5$ . The loading of  $\text{PtO}_x$  on the  $\text{Fe}_2\text{TiO}_5$  was the same as the procedure for  $\text{PtO}_x\text{-[Fe-doped TiO}_2]$ .

### Photocatalytic $\text{H}_2$ evolution

Visible light-induced  $\text{H}_2$  evolution was carried out in 300 mL septum-sealed glass reactor. In each run, 20 mg of the photocatalyst was well dispersed with magnetic stirring in a 50 mL of aqueous solution containing lactic acid (10 wt.%). The reactor was deoxygenated by bubbling nitrogen to remove oxygen and then placed in front of a 300 W Xe-lamp with a 420 nm cut-off filter (FSQ-GG420, Newport) under constant stirring. 0.5 mL of the gas in the headspace of the reactor was analyzed by GC to determine the amount of evolved  $\text{H}_2$ .

### Characterizations

Transmission electron microscopy (TEM) images were obtained on a JEOL JEM 1230 microscope operating at 120 kV. High resolution TEM images were performed on a Tecnai G<sup>2</sup> 20 instrument operated at 200 kV. Scanning electron microscopy (SEM) images were taken on a JEOL 6360 instrument at an accelerating voltage of 3 kV. Powder X-ray diffraction (XRD) patterns were collected on a Bruker SMART APEX II X-ray diffractometer with  $\text{Cu K}\alpha$  radiation ( $\lambda = 1.5406 \text{ \AA}$ ) at a scan rate of  $1.0^\circ \text{ min}^{-1}$ . All samples were dried at 100 °C overnight to remove guest solvent molecules within the pores before the XRD scan. XPS measurements were carried out in an ion-pumped chamber (evacuated to  $10^{-9}$  Torr) of a photoelectron spectrometer (Kratos Axis-Ultra) equipped with a focused X-ray source ( $\text{Al K}\alpha$ ,  $h\nu = 1486.6 \text{ eV}$ ). The UV-vis spectra were recorded on a Cary 300 Bio UV-visible spectrophotometer.  $\text{N}_2$  adsorption-desorption isotherms were carried out at the temperature of liquid nitrogen with a Quantachrome Autosorb-1 system. The BET surface areas were calculated in the range of 0.05–0.3  $\text{P/P}_0$ . Thermogravimetric analysis (TGA) was performed with a TGA/SDTA 851e

thermogravimetric analyzer from room temperature to 600 °C with a heating rate of 5 °C min<sup>-1</sup> under an air flow of 50 mL min<sup>-1</sup>.

Operation conditions for GC analysis:

- + Carrier gas: nitrogen at 15 Psi
- + Column: Carboxen-1010 Plot Capillary 30 m x 0.53 mm.
- + Detector: TCD
- + Column temperature: 30 °C
- + Retention time of H<sub>2</sub>: 0.9 min

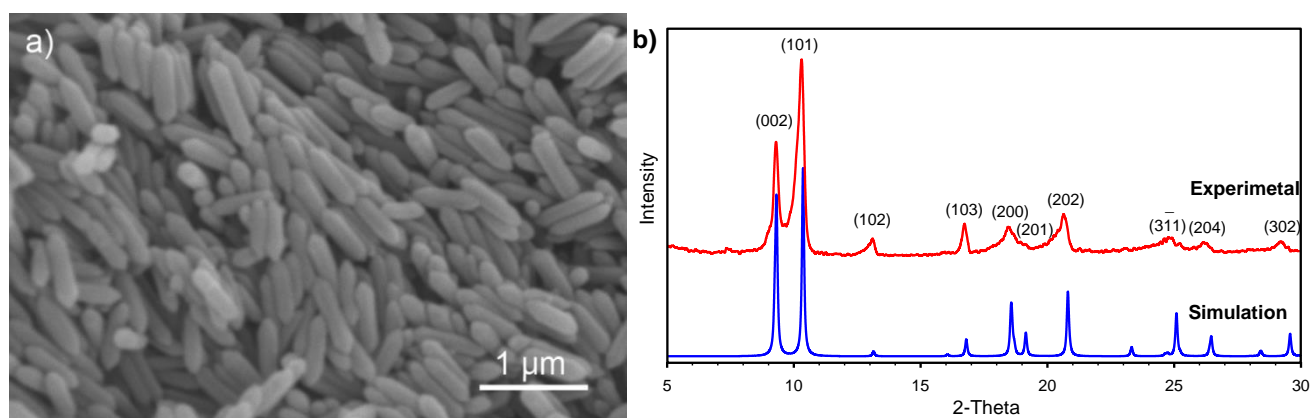

**Fig. S1** SEM image (a) and XRD pattern (b) of the starting MIL-88B nanocrystals

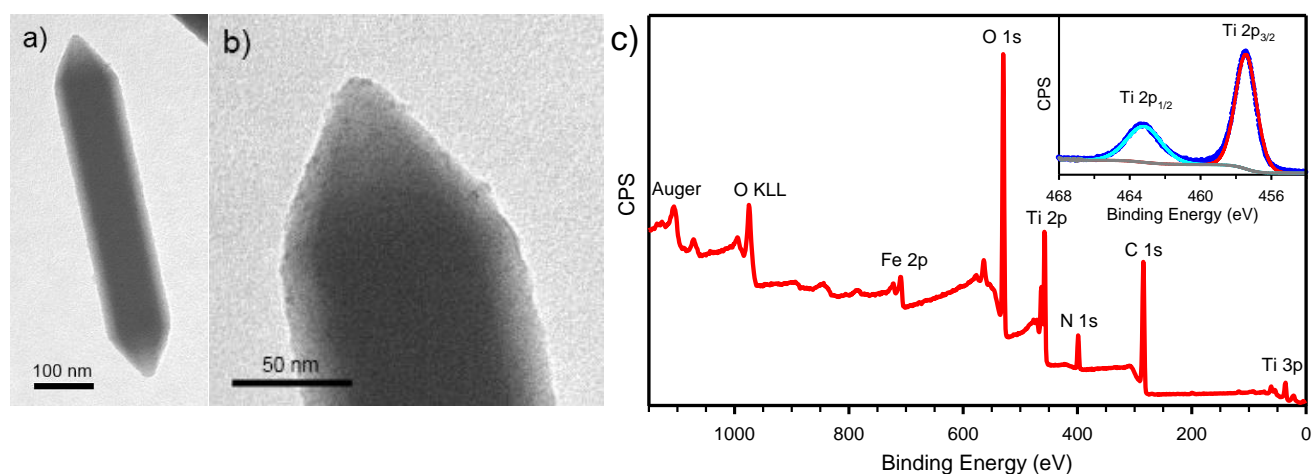

**Fig. S2** TEM images (a, b), XPS survey and high-resolution Ti 2p (inset) spectra (c) of TEAI-grafted MIL-88B nanocrystals.

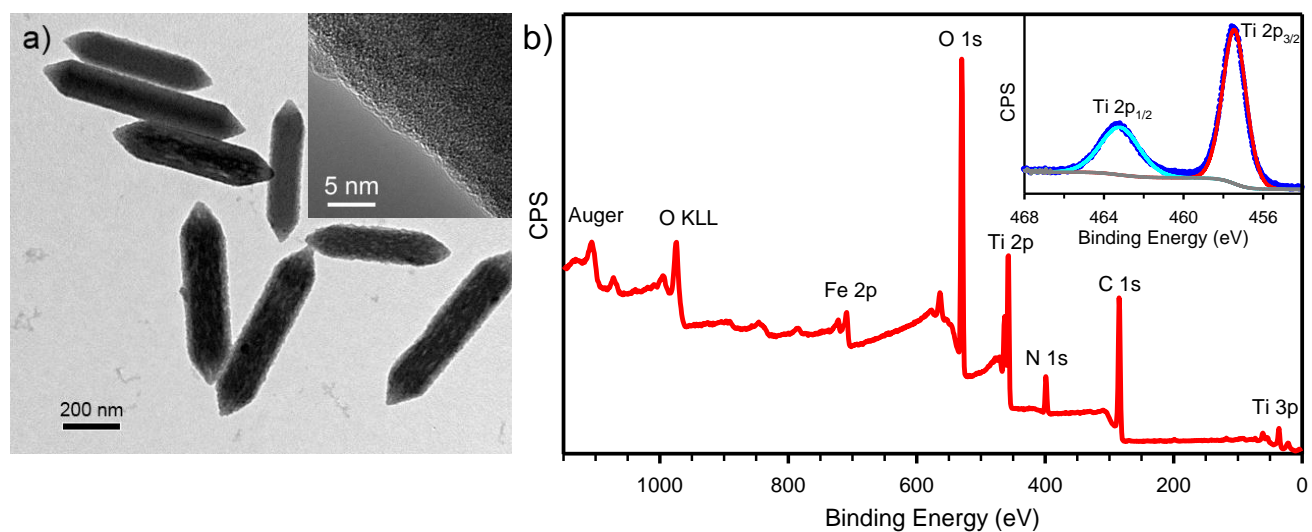

**Fig. S3** TEM and HRTEM (inset) images (a), XPS survey and high-resolution Ti 2p (inset) spectra (b) of coated MIL-88B@TiO<sub>2</sub> nanoparticles prepared with the concentration of TEAI at 6 mM TEAI.

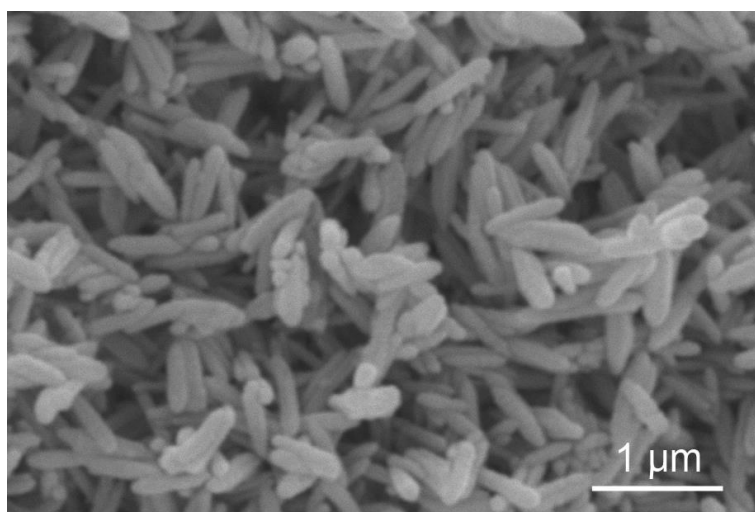

**Fig. S4** SEM image of the  $\alpha$ -Fe<sub>2</sub>O<sub>3</sub>-TiO<sub>2</sub>-PtO<sub>x</sub> sample after calcination.

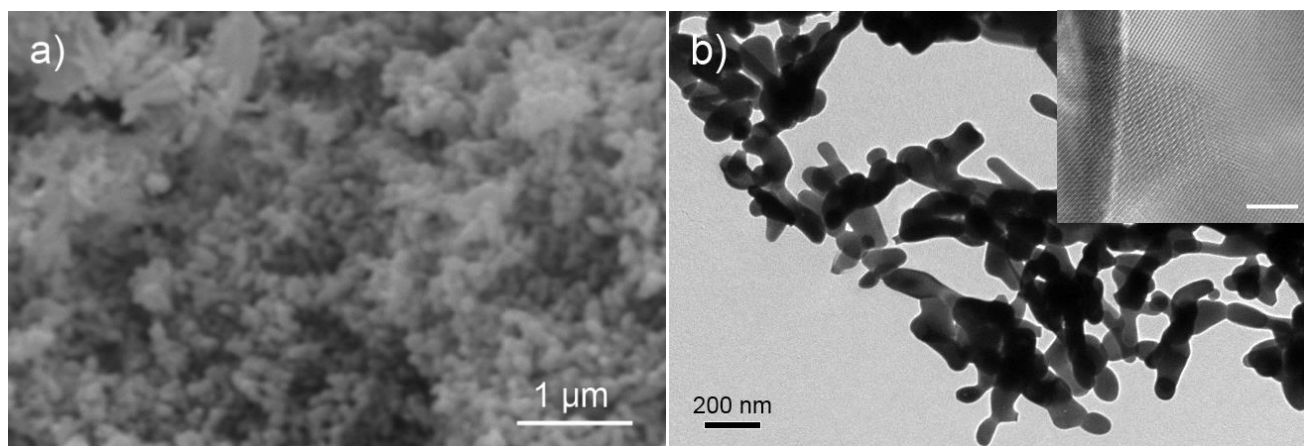

**Fig. S5** SEM (a) and TEM (b) images of the iron oxide sample obtained after calcination of the pristine MIL-88B nanocrystals. HRTEM image (inset) indicates the fusion of iron oxide nanoparticles. (scale bar of 5 nm).

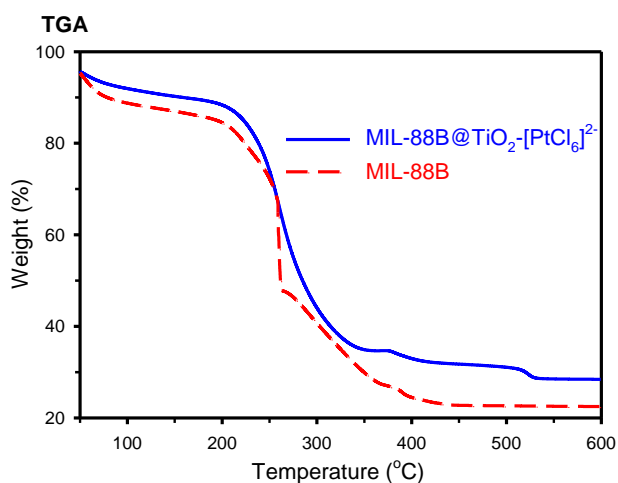

**Fig. S6** Thermogravimetric analysis (TGA) of MIL-88B and MIL-88B@TiO<sub>2</sub>-[PtCl<sub>6</sub>]<sup>2-</sup>. The weight retention differential of 8.0 % at 500 °C attributed to the coated TiO<sub>2</sub> and loaded PtO<sub>x</sub>.



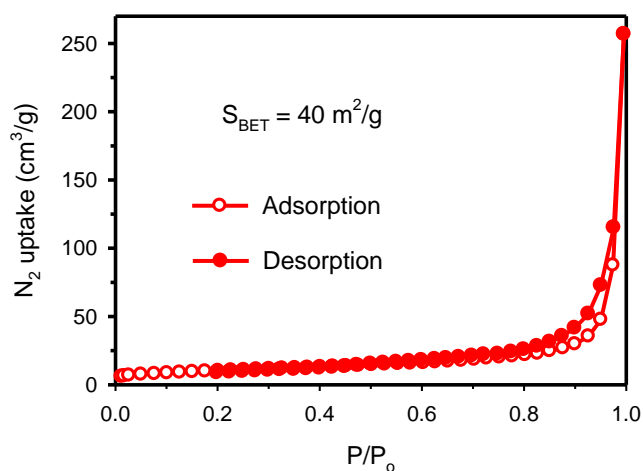

**Fig. S7** N<sub>2</sub> adsorption-desorption isotherms at 77 K of the  $\alpha$ -Fe<sub>2</sub>O<sub>3</sub>-TiO<sub>2</sub>-PtO<sub>x</sub> sample

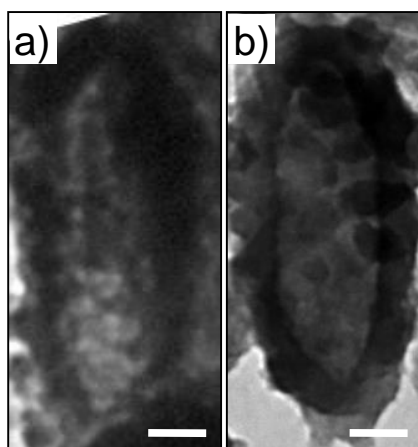

**Fig. S8** The hollow nanoparticles with various thicknesses of Fe<sub>2</sub>O<sub>3</sub>-TiO<sub>2</sub> hybrid wall prepared with the concentration of TEAI at 25 mM (a) and 50 mM (b) while keeping the same other reaction parameters (scale bar of 50 nm).

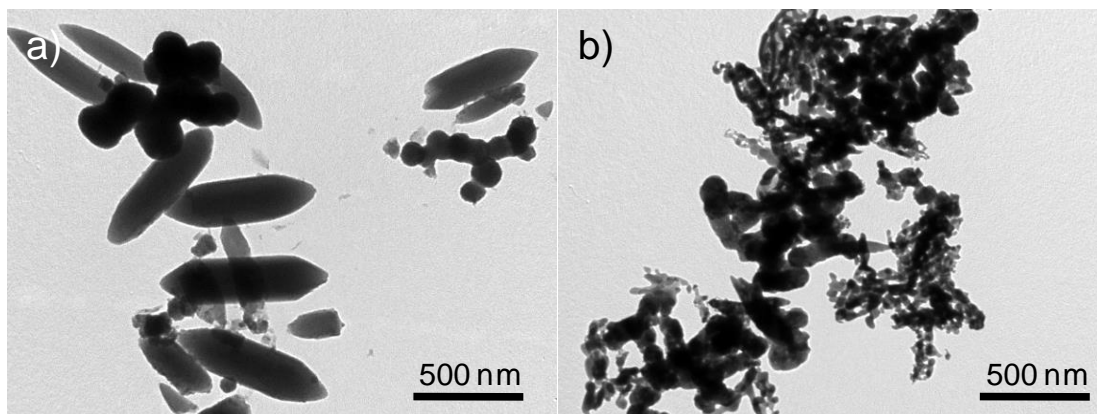

**Fig. S9** TEM images of the sample prepared using titanium (IV) butoxide without amine group as grafting reagent instead of TEAI: A separated mixture of TiO<sub>2</sub> nanoparticles and MIL-88B nanocrystals before calcination (a), and TiO<sub>2</sub> particles and Fe<sub>2</sub>O<sub>3</sub> particles after calcination (b).

**Table S1** Photocatalytic activities of the hollow hybrid and the benchmarks for H<sub>2</sub> evolution

| Photocatalyst                                                                  | Precursor                    | Evolved H <sub>2</sub> gas ( $\mu\text{mol}\cdot\text{h}^{-1}$ ) |
|--------------------------------------------------------------------------------|------------------------------|------------------------------------------------------------------|
| Fe <sub>2</sub> O <sub>3</sub> -TiO <sub>2</sub> -PtO <sub>x</sub> Hybrid      | TEAI                         | 22                                                               |
| Fe <sub>2</sub> O <sub>3</sub> -TiO <sub>2</sub> -PtO <sub>x</sub> Mixed Oxide | Ti(OBu) <sub>4</sub>         | trace                                                            |
| PtO <sub>x</sub> -Fe <sub>2</sub> O <sub>3</sub>                               | Pristine MIL-88B             | trace                                                            |
| PtO <sub>x</sub> -TiO <sub>2</sub>                                             | P25                          | trace                                                            |
| PtO <sub>x</sub> -Fe <sub>2</sub> TiO <sub>5</sub>                             | Fe/Ti = 1.0 <sup>(S2)</sup>  | trace                                                            |
| PtO <sub>x</sub> -[Fe-doped TiO <sub>2</sub> ]                                 | Fe/Ti = 0.01 <sup>(S1)</sup> | 6                                                                |
| Without catalyst                                                               | –                            | 0                                                                |

## References

- S1 J. Choi, H. Park, M. R. Hoffmann, *J. Phys. Chem. C* 2010, **114**, 783.  
S2 A. Khaleel, *Colloids and Surfaces A: Physicochem. Eng. Aspects* 2009, **346**, 130.
